# Supplementary material
Source: PubMed Central journal article supplement (PMC1323173)
Supplement: pnas_0507554102_2.pdf [file pnas_0507554102_2.pdf]

V Beta

|       |       |   |   |   |   |   |   |   |    |    |    |    |    |    |    |    |    |    |    |    |    |    |    |    |       |    |    |    |    |    |    |    |    |    |    |    |    |    |    |    |    |    |    |    |    |    |    |    |    |    |    |    |    |    |    |   |   |
|-------|-------|---|---|---|---|---|---|---|----|----|----|----|----|----|----|----|----|----|----|----|----|----|----|----|-------|----|----|----|----|----|----|----|----|----|----|----|----|----|----|----|----|----|----|----|----|----|----|----|----|----|----|----|----|----|----|---|---|
|       | CDR 1 |   |   |   |   |   |   |   |    |    |    |    |    |    |    |    |    |    |    |    |    |    |    |    | CDR 2 |    |    |    |    |    |    |    |    |    |    |    |    |    |    |    |    |    |    |    |    |    |    |    |    |    |    |    |    |    |    |   |   |
| 1     | 2     | 3 | 4 | 5 | 6 | 7 | 8 | 9 | 10 | 11 | 12 | 13 | 14 | 15 | 16 | 17 | 18 | 19 | 20 | 21 | 22 | 23 | 24 | 25 | 26    | 27 | 28 | 29 | 30 | 31 | 32 | 33 | 34 | 35 | 36 | 37 | 38 | 39 | 40 | 41 | 42 | 43 | 44 | 45 | 46 | 47 | 48 | 49 | 50 | 51 | 52 | 53 | 54 | 55 | 56 |   |   |
| 3.1.2 | E     | A | A | V | T | Q | S | P | R  | N  | K  | V  | T  | V  | T  | G  | N  | V  | T  | L  | S  | C  | R  | Q  | T     | N  | S  | H  | N  | Y  | M  | Y  | W  | Y  | R  | Q  | D  | T  | G  | H  | G  | L  | R  | L  | R  | L  | I  | Y  | Y  | S  | Y  | G  | A  | G  | N  | L | Q |

Clone 1  
Clone 5

3.2  
3.3  
3.4  
3.8  
3.9  
4.2  
4.6 (M2)  
4.8  
4.9

E  
E  
S  
G

V Beta Continued

|       |     |    |    |    |    |    |    |    |    |    |    |    |    |    |    |    |    |    |    |    |    |    |    |    |       |    |    |    |    |    |    |    |    |    |    |    |    |    |    |    |    |    |     |     |     |     |     |     |     |     |     |     |     |     |     |     |     |     |     |     |   |
|-------|-----|----|----|----|----|----|----|----|----|----|----|----|----|----|----|----|----|----|----|----|----|----|----|----|-------|----|----|----|----|----|----|----|----|----|----|----|----|----|----|----|----|----|-----|-----|-----|-----|-----|-----|-----|-----|-----|-----|-----|-----|-----|-----|-----|-----|-----|-----|---|
|       | HV4 |    |    |    |    |    |    |    |    |    |    |    |    |    |    |    |    |    |    |    |    |    |    |    | CDR 3 |    |    |    |    |    |    |    |    |    |    |    |    |    |    |    |    |    |     |     |     |     |     |     |     |     |     |     |     |     |     |     |     |     |     |     |   |
| 57    | 58  | 59 | 60 | 61 | 62 | 63 | 64 | 65 | 66 | 67 | 68 | 69 | 70 | 71 | 72 | 73 | 74 | 75 | 76 | 77 | 78 | 79 | 80 | 81 | 82    | 83 | 84 | 85 | 86 | 87 | 88 | 89 | 90 | 91 | 92 | 93 | 94 | 95 | 96 | 97 | 98 | 99 | 100 | 101 | 102 | 103 | 104 | 105 | 106 | 107 | 108 | 109 | 110 | 111 | 112 | 113 | 114 | 115 | 116 | 316 |   |
| 3.1.2 | I   | G  | D  | V  | P  | D  | G  | _  | Y  | K  | A  | T  | R  | T  | T  | Q  | E  | D  | F  | F  | L  | L  | L  | E  | S     | A  | S  | P  | S  | Q  | T  | S  | L  | Y  | F  | C  | A  | S  | S  | G  | A  | G  | _   | G   | A   | G   | T   | G   | Q   | L   | Y   | F   | G   | E   | G   | S   | K   | L   | T   | V   | L |

Clone 1  
Clone 5

3.2  
3.3  
3.4  
3.8  
3.9  
4.2  
4.6 (M2)  
4.8  
4.9

A  
A  
N  
A  
V  
A  
A  
A

V  
V  
V  
V  
V

S  
S  
S  
S  
S  
S  
S

M  
H  
D  
H

V Alpha

|       |       |   |   |   |   |   |   |   |    |    |    |    |    |    |    |    |    |    |    |    |    |    |    |    |       |    |    |    |    |    |    |    |    |    |    |    |    |    |    |    |    |    |    |    |    |    |    |    |    |    |    |    |    |    |   |
|-------|-------|---|---|---|---|---|---|---|----|----|----|----|----|----|----|----|----|----|----|----|----|----|----|----|-------|----|----|----|----|----|----|----|----|----|----|----|----|----|----|----|----|----|----|----|----|----|----|----|----|----|----|----|----|----|---|
|       | CDR 1 |   |   |   |   |   |   |   |    |    |    |    |    |    |    |    |    |    |    |    |    |    |    |    | CDR 2 |    |    |    |    |    |    |    |    |    |    |    |    |    |    |    |    |    |    |    |    |    |    |    |    |    |    |    |    |    |   |
| 1     | 2     | 3 | 4 | 5 | 6 | 7 | 8 | 9 | 10 | 11 | 12 | 13 | 14 | 15 | 16 | 17 | 18 | 19 | 20 | 21 | 22 | 23 | 24 | 25 | 26    | 27 | 28 | 29 | 30 | 31 | 32 | 33 | 34 | 35 | 36 | 37 | 38 | 39 | 40 | 41 | 42 | 43 | 44 | 45 | 46 | 47 | 48 | 49 | 50 | 51 | 52 | 53 | 54 | 55 |   |
| 3.1.2 | Q     | W | G | E | E | N | L | Q | A  | L  | S  | I  | Q  | E  | G  | E  | D  | V  | T  | M  | N  | C  | S  | Y  | K     | T  | Y  | T  | T  | _  | V  | V  | Q  | W  | Y  | R  | Q  | K  | S  | G  | K  | G  | P  | A  | Q  | L  | I  | L  | I  | R  | S  | N  | E  | R  | E |

Clone 1  
Clone 5

3.2  
3.3  
3.4  
3.8  
3.9  
4.2  
4.6 (M2)  
4.8  
4.9

A

E  
E  
E  
E  
E  
E  
E  
E

S  
S  
S  
S  
S  
S  
S  
S

E  
E  
E  
E  
E  
E  
E

H  
H  
P  
E

V Alpha Continued

|       |     |    |    |    |    |    |    |    |    |    |    |    |    |    |    |    |    |    |    |    |    |    |    |    |       |    |    |    |    |    |    |    |    |    |    |    |     |    |    |    |    |    |    |     |     |     |     |     |     |     |     |     |     |     |     |     |     |     |     |     |     |     |
|-------|-----|----|----|----|----|----|----|----|----|----|----|----|----|----|----|----|----|----|----|----|----|----|----|----|-------|----|----|----|----|----|----|----|----|----|----|----|-----|----|----|----|----|----|----|-----|-----|-----|-----|-----|-----|-----|-----|-----|-----|-----|-----|-----|-----|-----|-----|-----|-----|-----|
|       | HV4 |    |    |    |    |    |    |    |    |    |    |    |    |    |    |    |    |    |    |    |    |    |    |    | CDR 3 |    |    |    |    |    |    |    |    |    |    |    | 118 |    |    |    |    |    |    |     |     |     |     |     |     |     |     |     |     |     |     |     |     |     |     |     |     |     |
| 56    | 57  | 58 | 59 | 60 | 61 | 62 | 63 | 64 | 65 | 66 | 67 | 68 | 69 | 70 | 71 | 72 | 73 | 74 | 75 | 76 | 77 | 78 | 79 | 80 | 81    | 82 | 83 | 84 | 85 | 86 | 87 | 88 | 89 | 90 | 91 | 92 | 93  | 94 | 95 | 96 | 97 | 98 | 99 | 100 | 101 | 102 | 103 | 104 | 105 | 106 | 107 | 108 | 109 | 110 | 111 | 112 | 113 | 114 | 115 | 116 | 117 | 118 |
| 3.1.2 | K   | R  | S  | G  | R  | L  | R  | A  | T  | L  | D  | T  | S  | _  | Q  | T  | S  | S  | L  | S  | I  | T  | G  | T  | L     | A  | T  | D  | T  | A  | V  | Y  | F  | C  | A  | I  | T   | _  | _  | _  | _  | S  | G  | G   | N   | Y   | K   | P   | T   | F   | G   | K   | G   | T   | S   | L   | V   | V   | H   | P   | Y   | 118 |

Clone 1  
Clone 5

3.2  
3.3  
3.4  
3.8  
3.9  
4.2  
4.6 (M2)  
4.8  
4.9

T

I  
V

H  
H  
H

R

R
