# Supplementary material
Source: PubMed Central journal article supplement (PMC1323173)

**A.**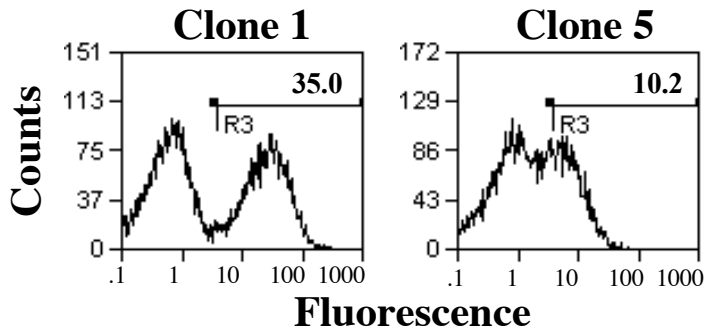**B.**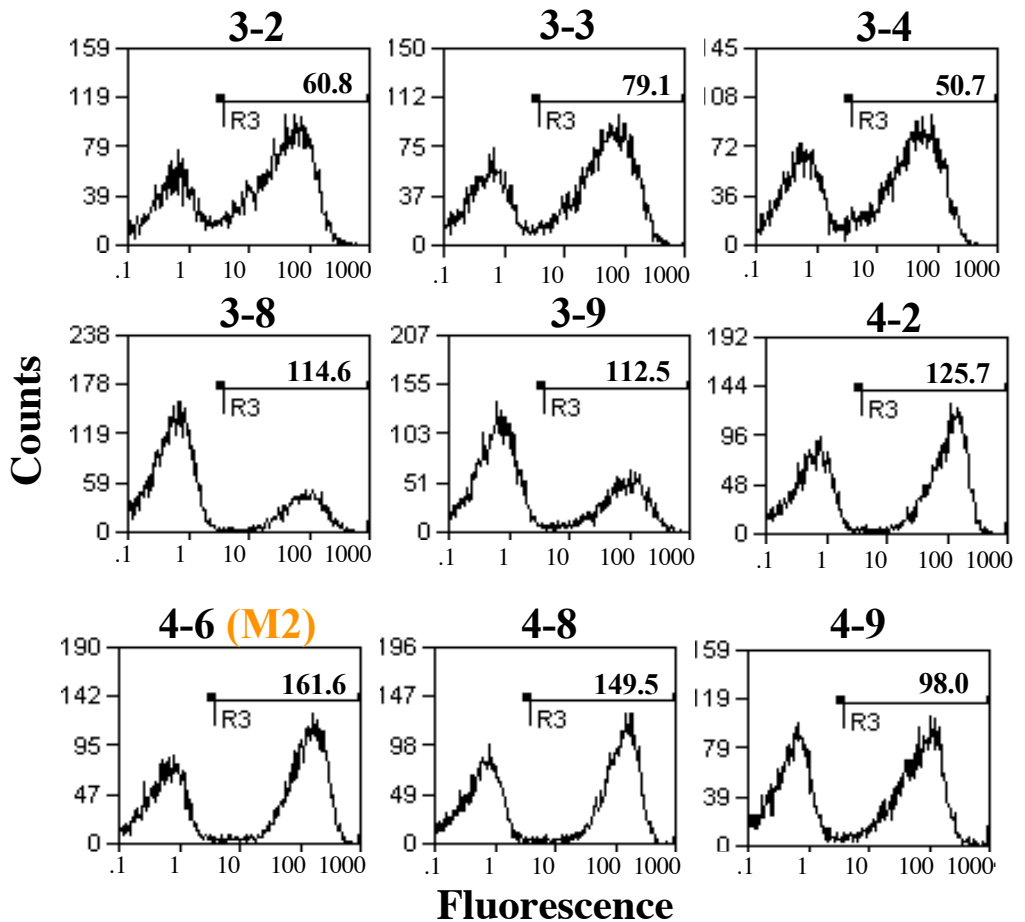

Supplement: pnas_0507554102_1.pdf [file pnas_0507554102_1.pdf]

**% Expression**

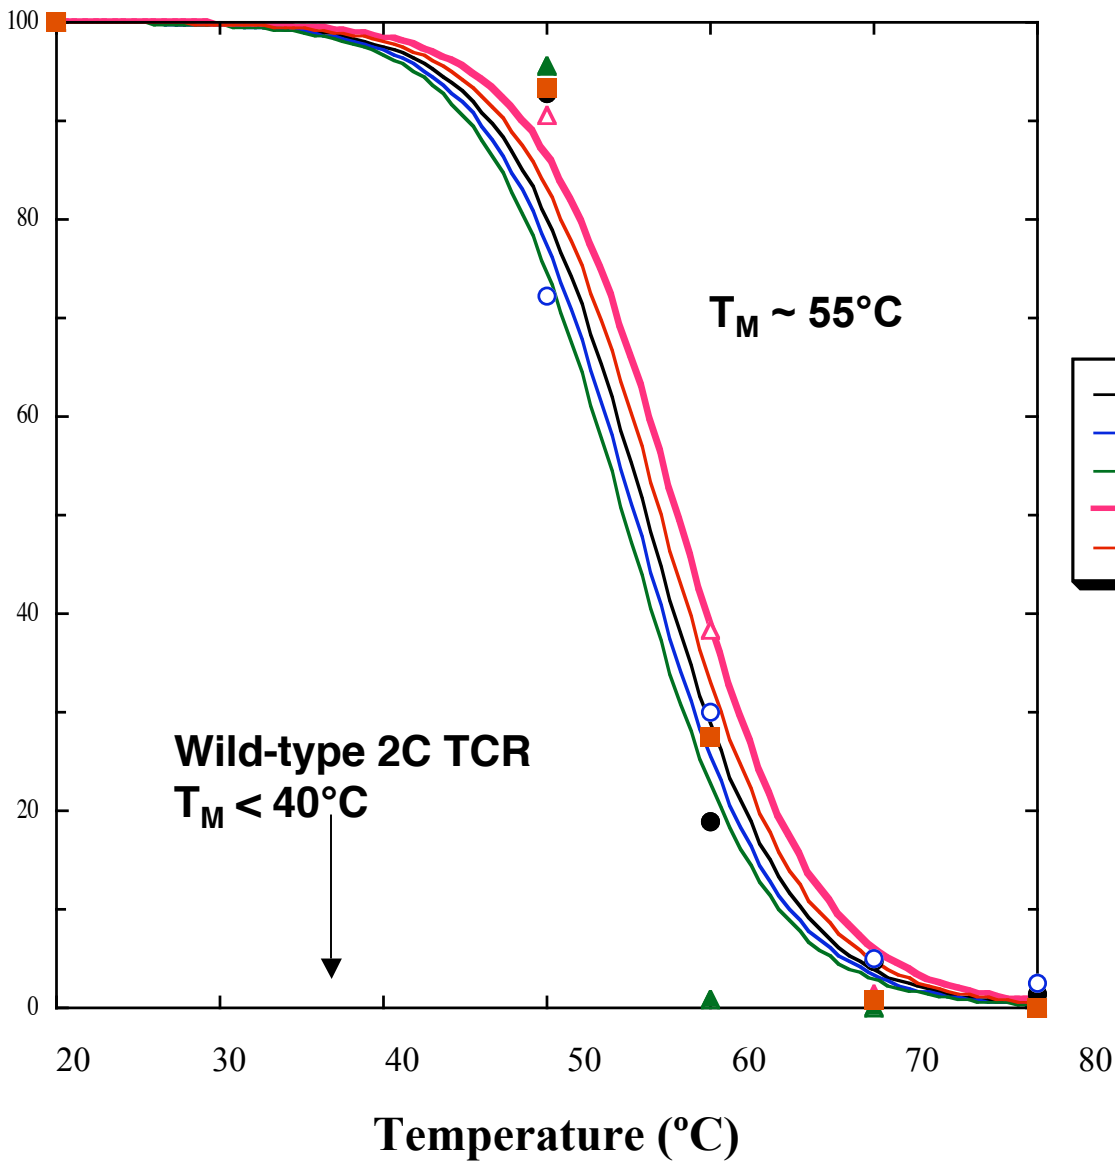

Supplement: pnas_0507554102_3.pdf [file pnas_0507554102_3.pdf]

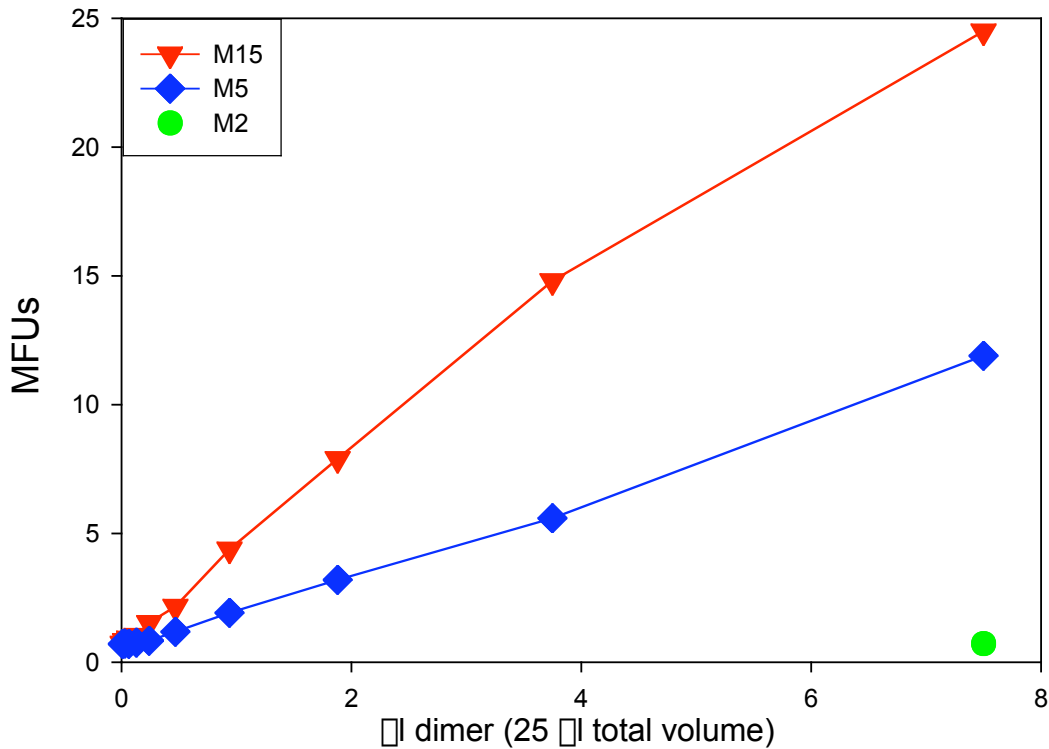

Supplement: pnas_0507554102_4.pdf [file pnas_0507554102_4.pdf]

M1

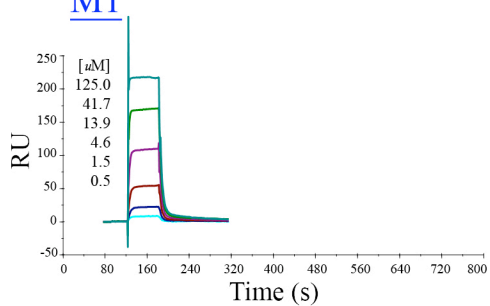

M2

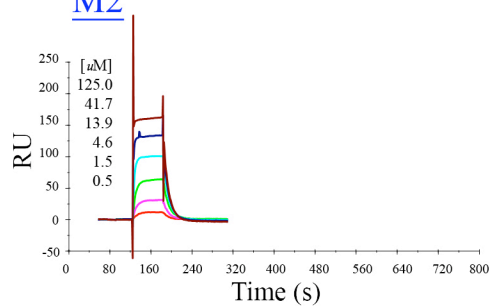

M4

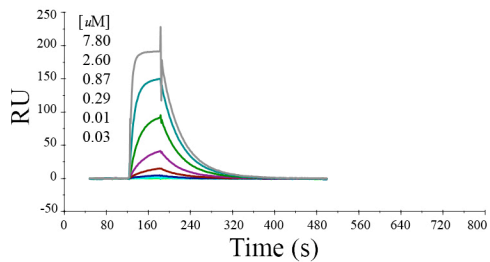

M5

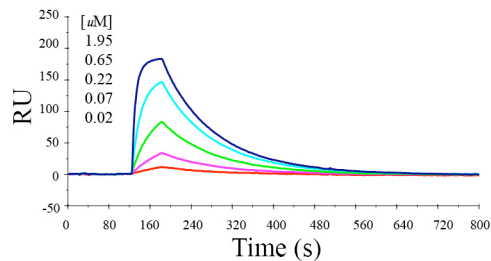

M14

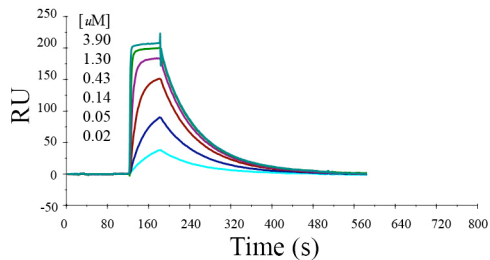

M15

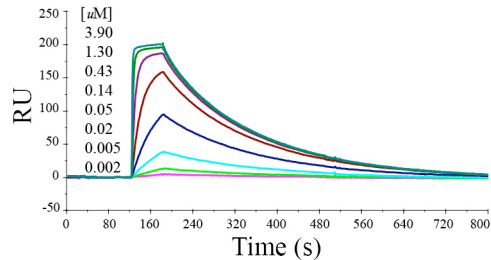

Supplement: pnas_0507554102_5.pdf [file pnas_0507554102_5.pdf]
